# Supplementary material for: Disaster planning for a surgical surge: when mass trauma threatens to overwhelm your operating rooms
Source: HighWire-hosted journal article supplement (doi:10.1136/tsaco-2023-001224), 2023-11-01
Supplement: tsaco-2023-001224supp001_data_supplement.pdf [file tsaco-2023-001224supp001_data_supplement.pdf]

## Appendix 1: Checklist for disaster planning for a surgical surge

|                                 |                                                                                                                                                                                               |
|---------------------------------|-----------------------------------------------------------------------------------------------------------------------------------------------------------------------------------------------|
| Plan Development                |                                                                                                                                                                                               |
| <input type="checkbox"/>        | Involve key stakeholders from all components of the perioperative team in the planning process                                                                                                |
| <input type="checkbox"/>        | Develop clear objective activation criteria                                                                                                                                                   |
| Communication                   |                                                                                                                                                                                               |
| <input type="checkbox"/>        | Identify a clear communication strategy separate from everyday modes of communication                                                                                                         |
| <input type="checkbox"/>        | Identify all impacted personnel that would require notification (anesthesiology, blood bank, nursing, etc)                                                                                    |
| <input type="checkbox"/>        | Ensure communication strategy can remain active throughout entirety of event                                                                                                                  |
| <input type="checkbox"/>        | Create a backup plan for communication if primary mode of communication becomes inoperable                                                                                                    |
| Physical Space                  |                                                                                                                                                                                               |
| <input type="checkbox"/>        | Identify a physical space that can be utilized during a surgical disaster for assessment and post-operative management                                                                        |
| <input type="checkbox"/>        | Consider operating room work flow and number of available rooms and how best to allow for OR surge                                                                                            |
| <input type="checkbox"/>        | Develop a plan to rapidly discharge and/or transfer patients from recovery room and other hospital locations to ensure bed availability                                                       |
| <input type="checkbox"/>        | Create a contingency plan in the event current resources become unavailable (power failure, loss of resources) requiring immediate transfer of patients                                       |
| Staffing                        |                                                                                                                                                                                               |
| <input type="checkbox"/>        | Create a plan to provide adequate staffing and call-ins in coordination with hospital incident command                                                                                        |
| <input type="checkbox"/>        | Determine a predetermined location for staging and regularly exercise staff mobilization                                                                                                      |
| <input type="checkbox"/>        | Define surgeon response which should include a senior trauma surgeon for triage and surgeons for surgical response in the operating room                                                      |
| <input type="checkbox"/>        | Create a system for mobilization of subspecialty services including neurosurgery, orthopedic surgery, critical care                                                                           |
| <input type="checkbox"/>        | Create a plan to coordinate anesthesia in OR and for airway emergencies                                                                                                                       |
| Equipment                       |                                                                                                                                                                                               |
| <input type="checkbox"/>        | Instrument processing procedures should be reviewed to assess capability to provide multiple resources at various times of day as well as days of the week                                    |
| <input type="checkbox"/>        | Determine a method for resupply or special restock if instruments/resources run low during a disaster                                                                                         |
| <input type="checkbox"/>        | Ensure optimal PPE/sterile attire available for staff                                                                                                                                         |
| <input type="checkbox"/>        | Ensure adequate supply of specialty resources utilized during damage control (VAC dressings, external fixation devices, chest tubes, Pleur-evacs®, etc)                                       |
| Blood and Medications           |                                                                                                                                                                                               |
| <input type="checkbox"/>        | Create a plan to provide multiple massive transfusion protocols simultaneously and fairly                                                                                                     |
| <input type="checkbox"/>        | Determine resupply plan with regional blood bank                                                                                                                                              |
| <input type="checkbox"/>        | Pharmacy should determine method of restocking anesthetic medications and antibiotics                                                                                                         |
| Disposition Offloading          |                                                                                                                                                                                               |
| <input type="checkbox"/>        | Coordinate with the intensive care units and medical/surgical units to maximize patient offloading                                                                                            |
| <input type="checkbox"/>        | Hospital Incident Command should identify bed controllers for each unit to ensure forward patient flow is coordinated and optimize bed availability                                           |
| <input type="checkbox"/>        | Develop transfer agreements with outside hospitals which can be coordinated with a RMOC                                                                                                       |
| Special Populations             |                                                                                                                                                                                               |
| <input type="checkbox"/>        | Consider unique populations (pediatric, complex cardiac, transplant) to determine capabilities of your institution in caring for these patients and determine offload/transfer plan if needed |
| Plan Coordination and Rehearsal |                                                                                                                                                                                               |
| <input type="checkbox"/>        | Rehearse the disaster plan for surgical surge and review outcomes to optimize plan execution                                                                                                  |
